# Supplementary material for: The impact of an external electric field on the Rashba effect in two-dimensional hybrid perovskites
Source: Royal Society of Chemistry journal article supplement (doi:10.1039/d3tc01575k), 2023-01-01
Supplement: d3tc01575k1.pdf [file d3tc01575k1.pdf]

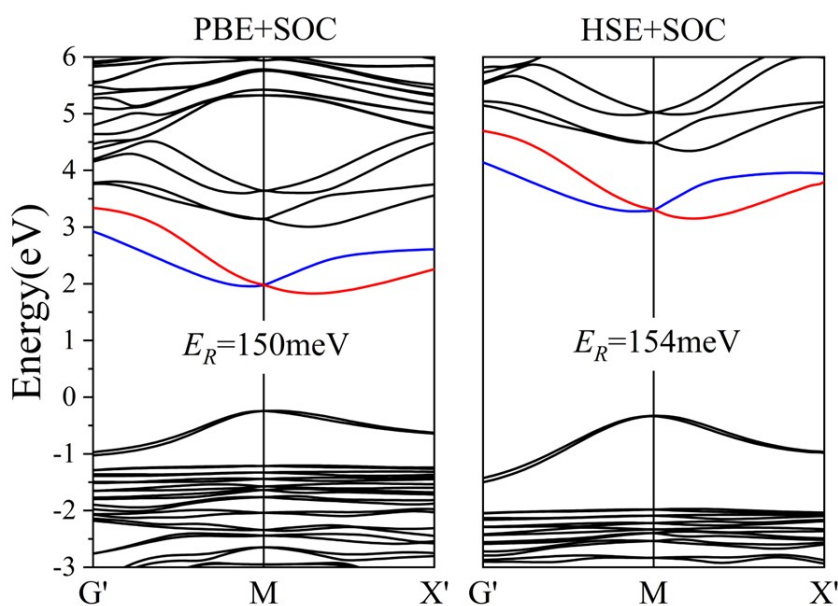

SFig.1 The energy bands of 1L MAPbBr<sub>3</sub> calculated by PBE+SOC and HSE+SOC methods.

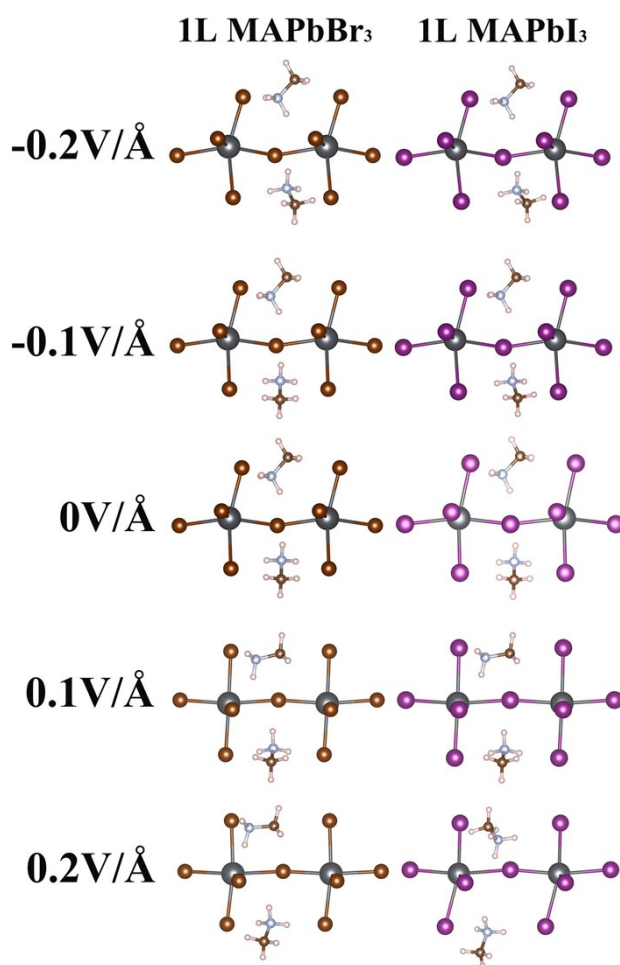

SFig.2 The structures of 1L MAPbBr<sub>3</sub> and MAPbI<sub>3</sub> under EEF of -0.2 V/Å to 0.2 V/Å.

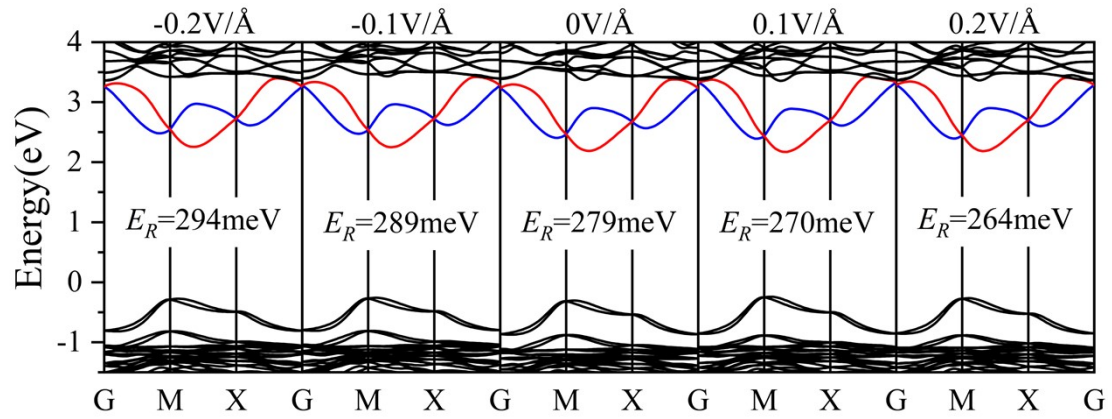

SFig.3 The energy bands of (PEA)<sub>2</sub>PbBr<sub>3</sub> under EEF of -0.2 V/Å to 0.2 V/Å. The split spin states of CBM have been highlighted by blue and red colors respectively.
